# Supplementary material
Source: publisher site journal article supplement (https://www.kjim.org/upload/media/kjim-2022-069-suppl2.pdf)
Supplement: Supplementary file 1 [file kjim-2022-069-suppl2.pdf]

**Supplementary Table 2. Multivariable logistic regression analysis by categorized corticosteroid use**

| Variable                                                            | Odds ratio | 95% Confidence interval |
|---------------------------------------------------------------------|------------|-------------------------|
| Total cumulative dosage (total cumulative dose over 1,000 mg)       | 21.688     | 2.689–174.900           |
| Adjusting sex                                                       | 23.624     | 2.888–193.264           |
| Adjusting age                                                       | 15.028     | 1.786–126.475           |
| Adjusting lymphocyte                                                | 14.736     | 1.767–122.893           |
| Adjusting creatinine                                                | 19.633     | 2.313–166.680           |
| Adjusting chronic kidney disease                                    | 19.934     | 2.452–162.061           |
| Adjusting COPD                                                      | 20.320     | 2.464–167.576           |
| Adjusting chronic liver disease                                     | 18.888     | 2.296–155.357           |
| Adjusting diabetes                                                  | 18.959     | 2.320–154.924           |
| Adjusting hematologic malignancy                                    | 18.888     | 2.296–155.357           |
| Adjusting oxygen therapy                                            | 12.891     | 1.414–117.524           |
| Daily high-dose use (mean daily dose over 60 mg)                    | 17.000     | 2.112–136.845           |
| Adjusting sex                                                       | 17.945     | 2.210–145.717           |
| Adjusting age                                                       | 12.296     | 1.494–101.218           |
| Adjusting lymphocyte                                                | 11.663     | 1.410–96.467            |
| Adjusting creatinine                                                | 16.854     | 1.924–147.664           |
| Adjusting chronic kidney disease                                    | 15.983     | 1.969–129.748           |
| Adjusting COPD                                                      | 16.434     | 1.984–136.152           |
| Adjusting chronic liver disease                                     | 15.079     | 1.832–124.101           |
| Adjusting diabetes                                                  | 15.461     | 1.907–125.380           |
| Adjusting hematologic malignancy                                    | 15.079     | 1.832–124.101           |
| Adjusting oxygen therapy                                            | 10.194     | 1.172–88.641            |
| Early 7-day high-dose use (early 7-day cumulative dose over 420 mg) | 3.970      | 0.997–15.800            |
| Adjusting sex                                                       | 4.129      | 1.026–16.619            |
| Adjusting age                                                       | 2.641      | 0.640–10.901            |
| Adjusting lymphocyte                                                | 2.686      | 0.653–11.043            |
| Adjusting creatinine                                                | 3.331      | 0.794–13.823            |
| Adjusting chronic kidney disease                                    | 3.475      | 0.852–14.169            |
| Adjusting COPD                                                      | 3.665      | 0.889–15.110            |
| Adjusting chronic liver disease                                     | 3.349      | 0.805–13.944            |
| Adjusting diabetes                                                  | 3.306      | 0.807–13.535            |
| Adjusting hematologic malignancy                                    | 5.812      | 1.164–29.013            |
| Adjusting oxygen therapy                                            | 1.731      | 0.350–8.571             |
| Prolonged use (over 14 days)                                        | 5.893      | 1.474–23.557            |
| Adjusting sex                                                       | 6.050      | 1.504–24.342            |
| Adjusting age                                                       | 3.661      | 0.865–15.498            |
| Adjusting lymphocyte                                                | 4.292      | 1.047–17.604            |
| Adjusting creatinine                                                | 5.612      | 1.325–23.765            |
| Adjusting chronic kidney disease                                    | 5.590      | 1.375–22.721            |
| Adjusting COPD                                                      | 6.217      | 1.457–26.534            |
| Adjusting chronic liver disease                                     | 4.842      | 1.158–20.242            |
| Adjusting diabetes                                                  | 4.912      | 1.191–20.252            |
| Adjusting hematologic malignancy                                    | 5.844      | 1.371–24.908            |
| Adjusting oxygen therapy                                            | 2.974      | 0.635–13.928            |

Corticosteroid doses are presented as methylprednisolone.  
COPD, chronic obstructive pulmonary disease.
